# Supplementary material
Source: PubMed Central journal article supplement (PMC7265113)

**A.**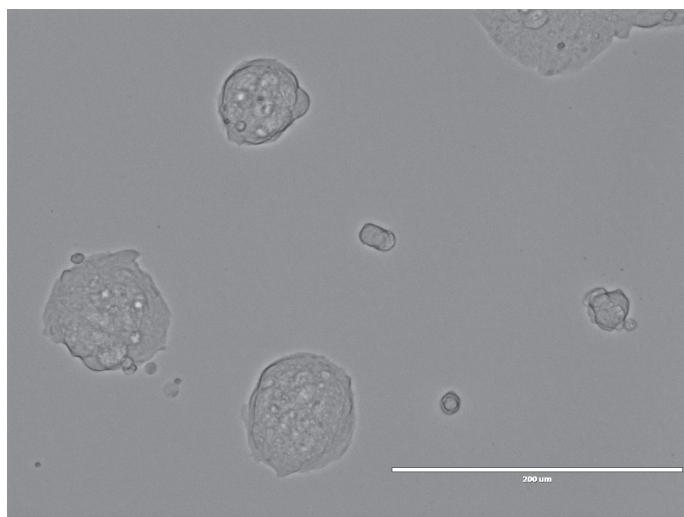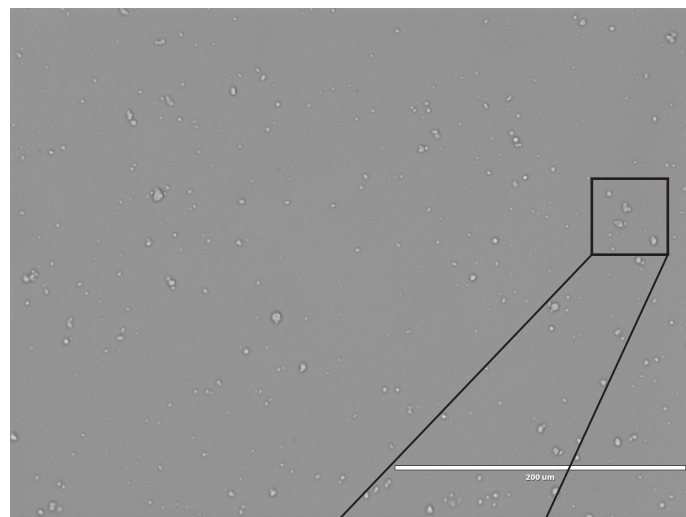**B.**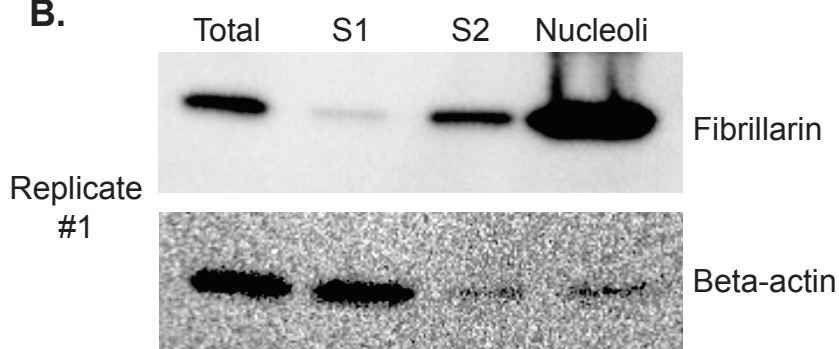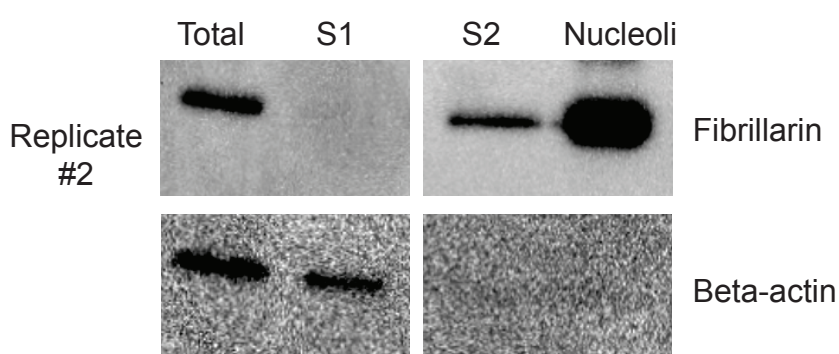**C.**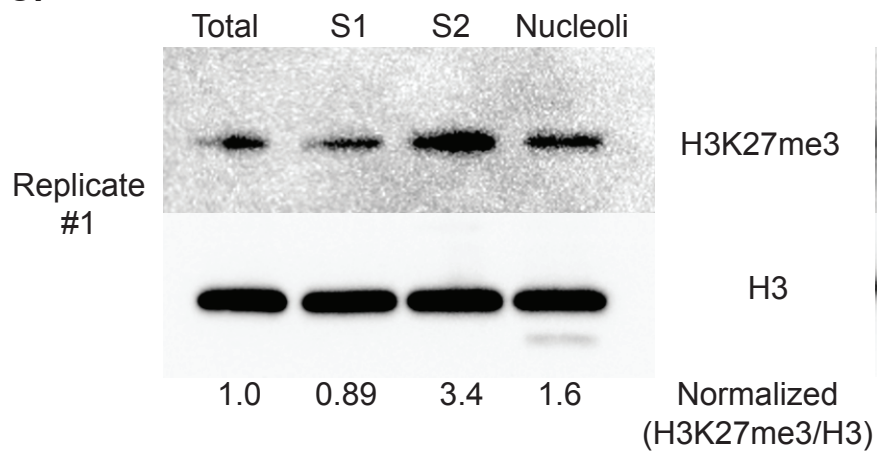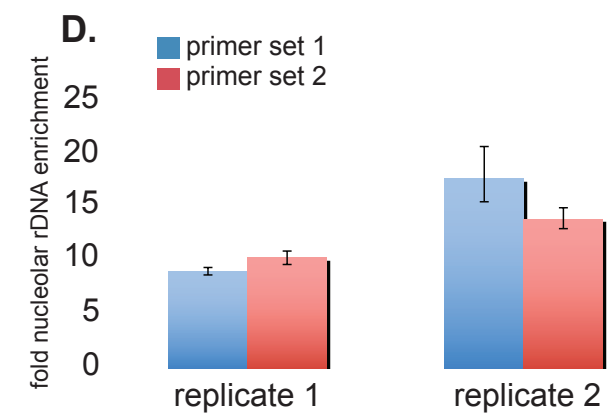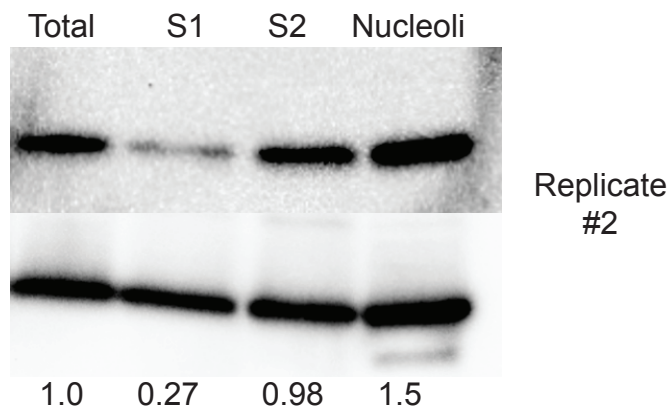

Supplement: NIHMS1579777-supplement-412_2020_734_MOESM1_ESM.pdf [file NIHMS1579777-supplement-412_2020_734_MOESM1_ESM.pdf]

A.

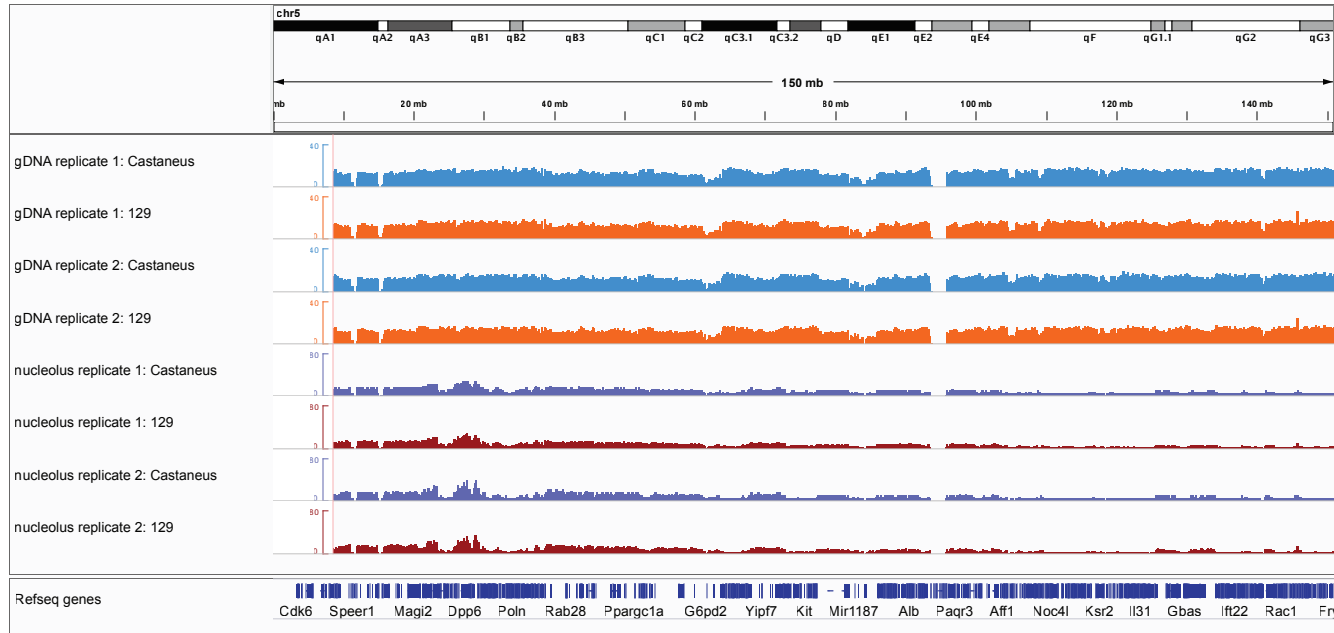

B.

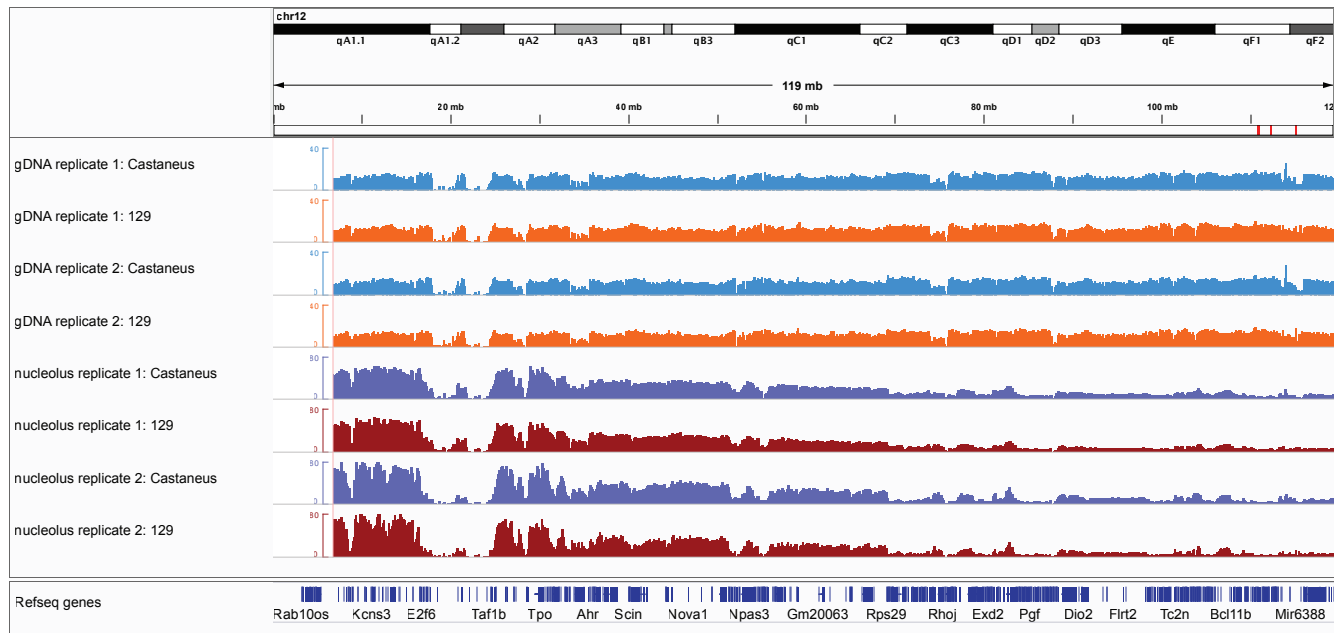

Supplement: NIHMS1579777-supplement-412_2020_734_MOESM3_ESM.pdf [file NIHMS1579777-supplement-412_2020_734_MOESM3_ESM.pdf]
